# Supplementary material for: Characterization and Diversity of 243 Complete Human Papillomavirus Genomes in Cervical Swabs Using Next Generation Sequencing
Source: MDPI journal article supplement (doi:10.3390/v12121437), 2020-12-14

**A****Generation of blind assembly input data**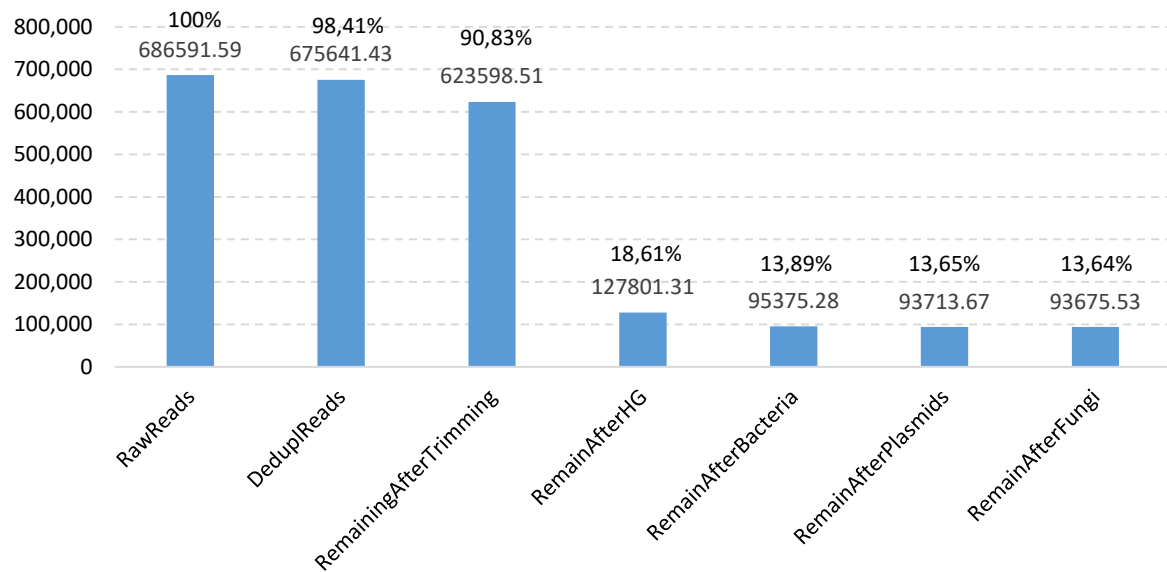**B****Generation of bowtie assembly input data (N=337; only HPV positive)**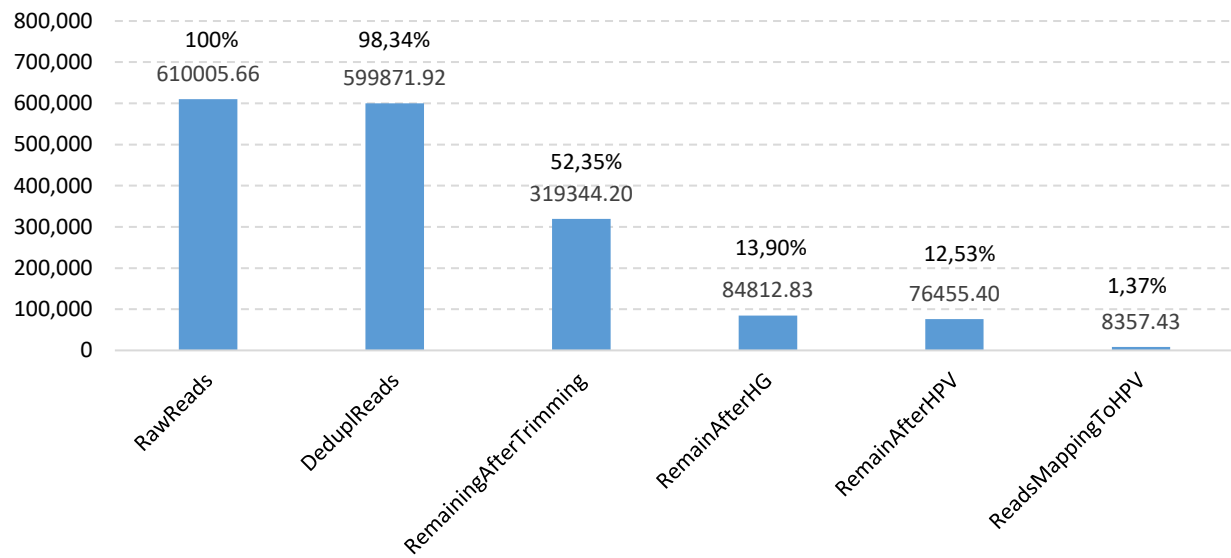

Supplement: s1 [file s1]
