# Supplementary material for: Characterization and Diversity of 243 Complete Human Papillomavirus Genomes in Cervical Swabs Using Next Generation Sequencing
Source: MDPI journal article supplement (doi:10.3390/v12121437), 2020-12-14
Supplement: s1 [file s1]

A

*Alpha-9, HPV16*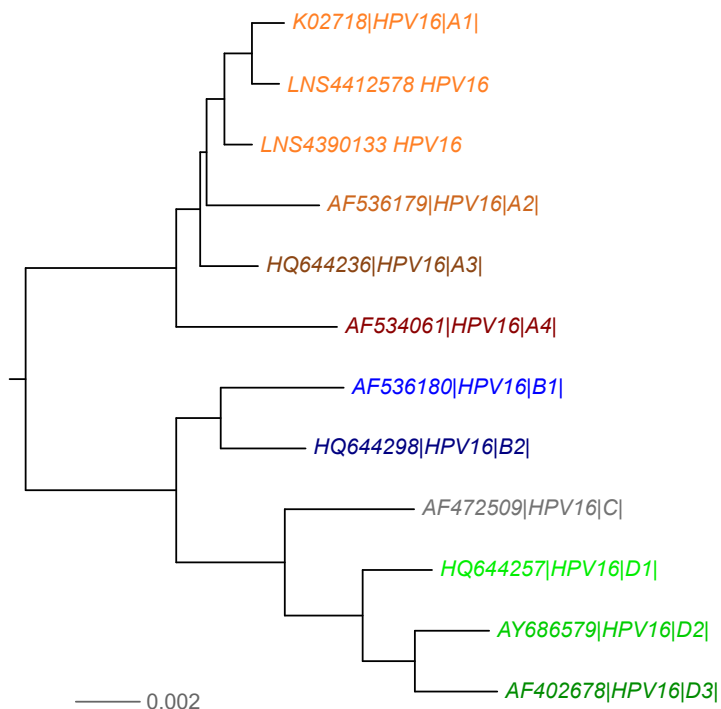

Complete Genome Tree

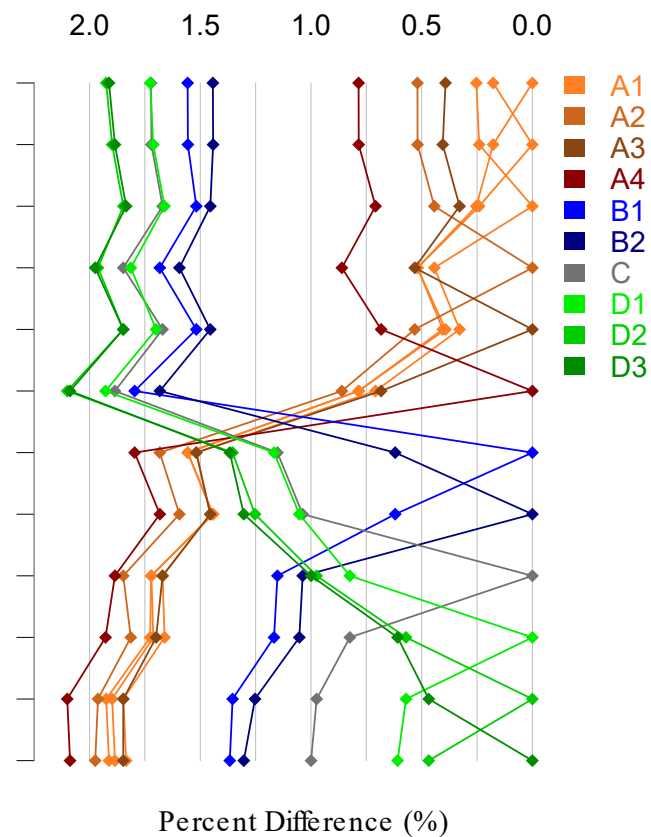

B

*Alpha-9, HPV31*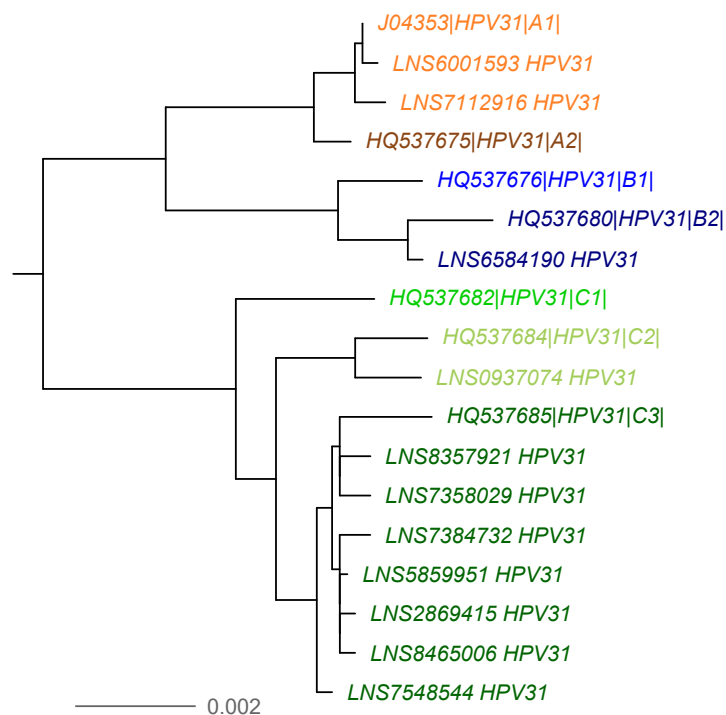

Complete Genome Tree

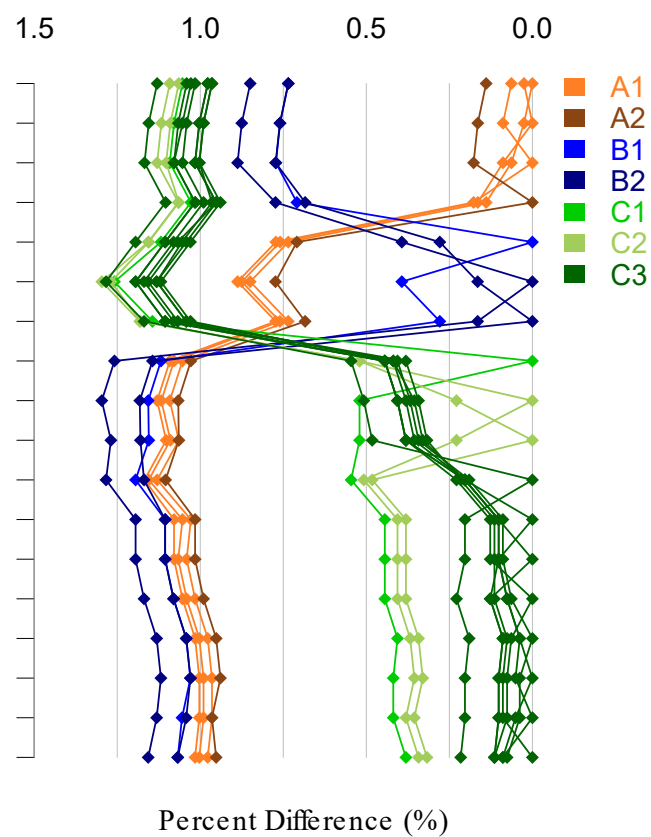

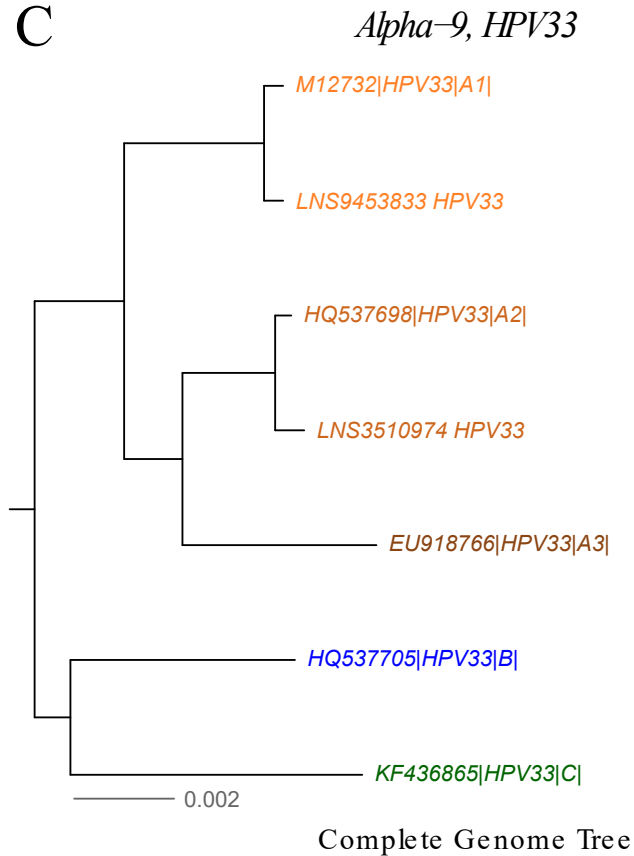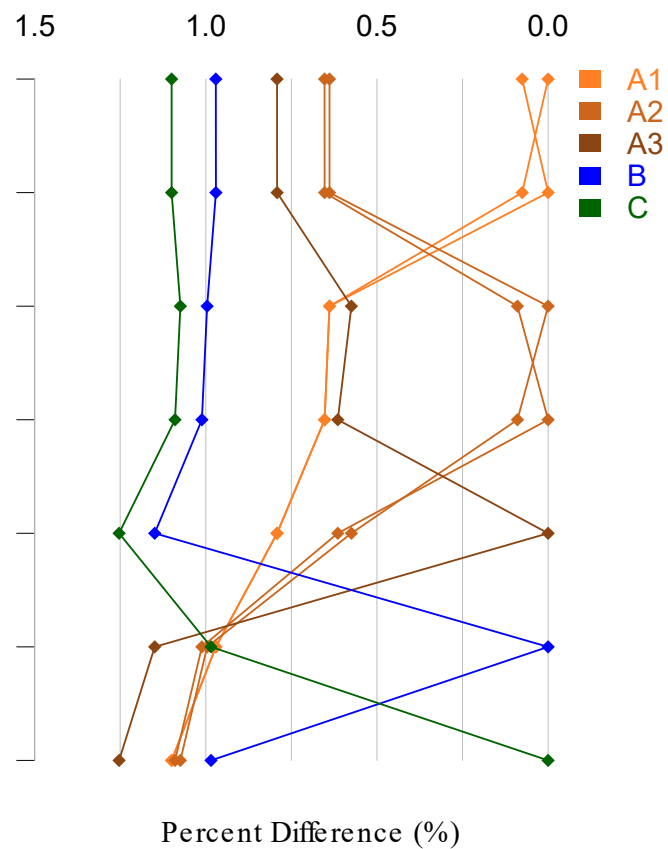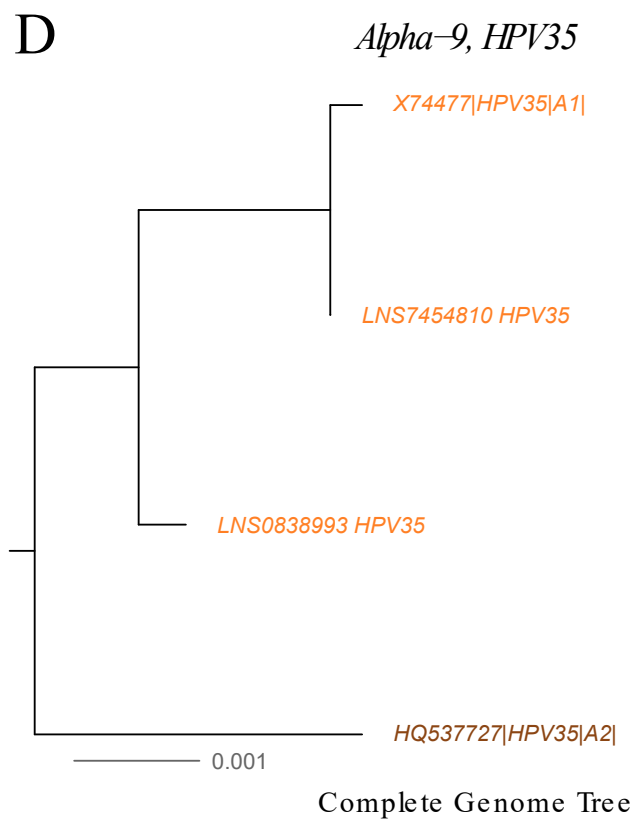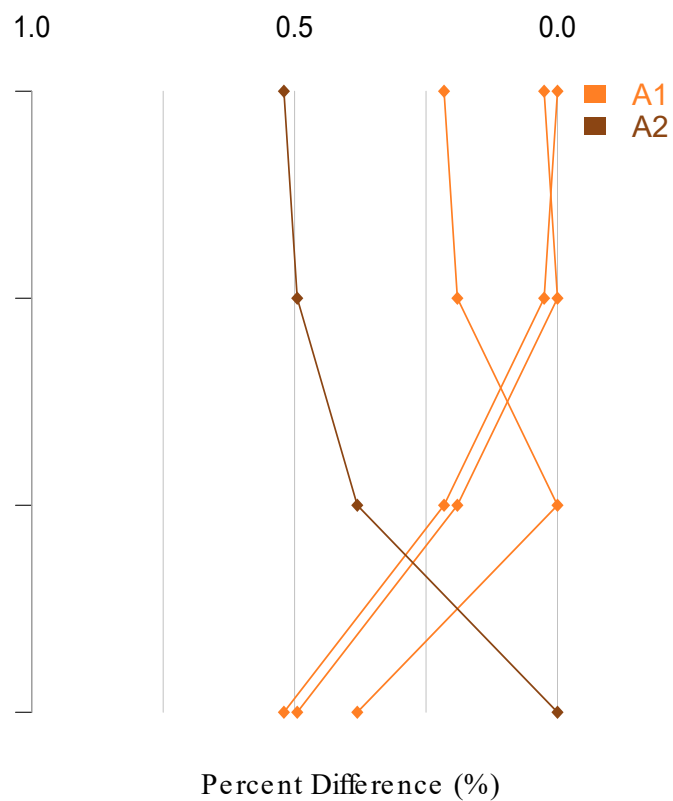

E

*Alpha-7, HPV39*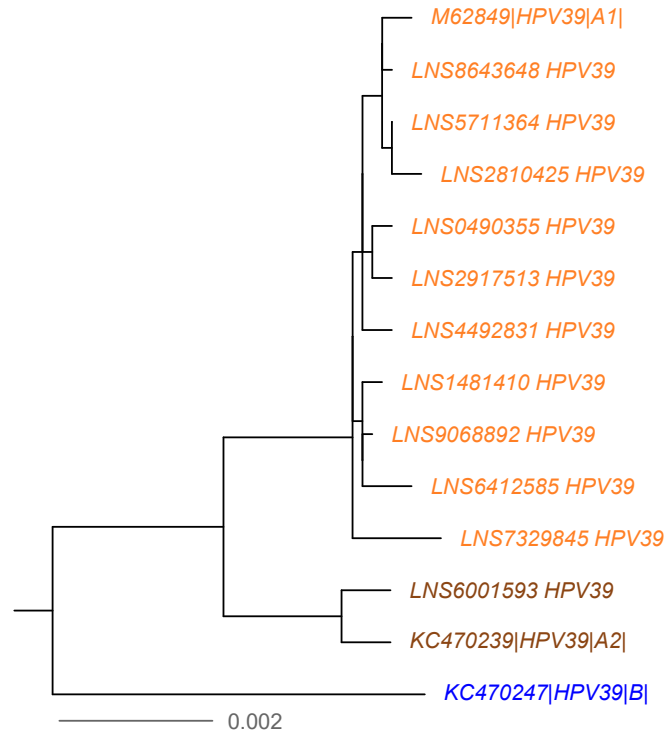

Complete Genome Tree

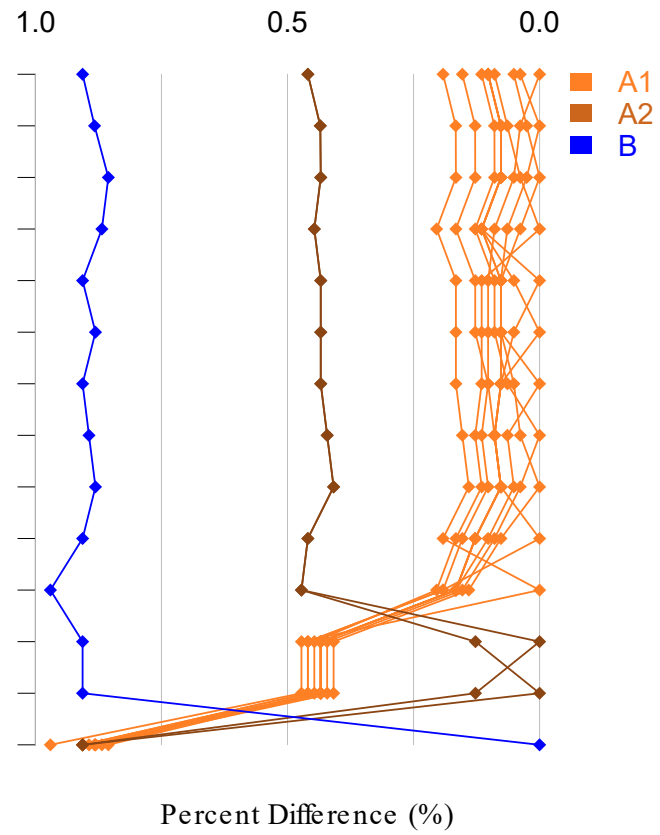

F

*Alpha-5, HPV51*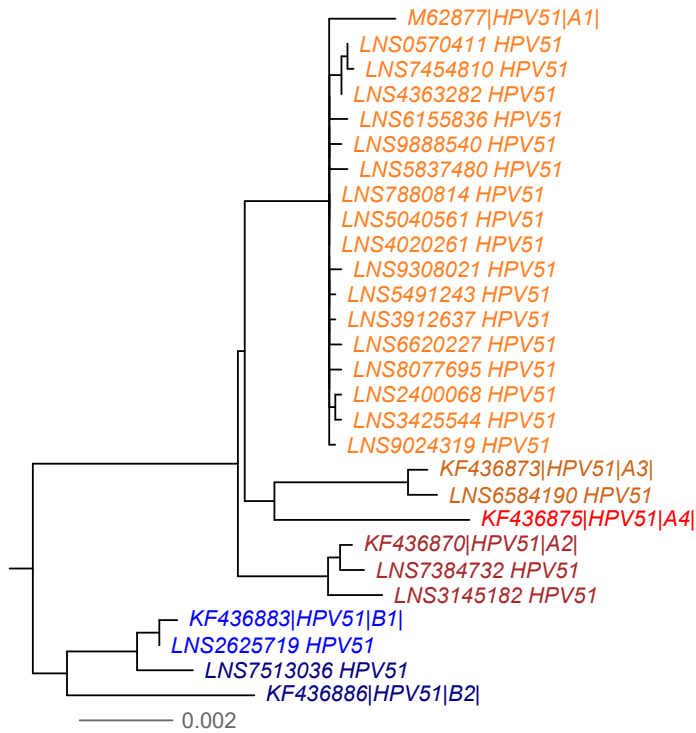

Complete Genome Tree

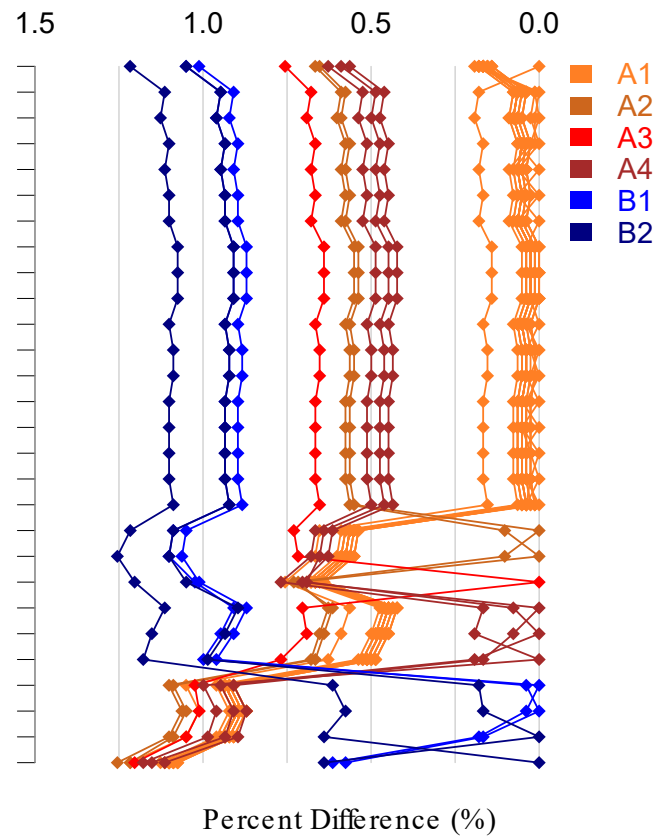

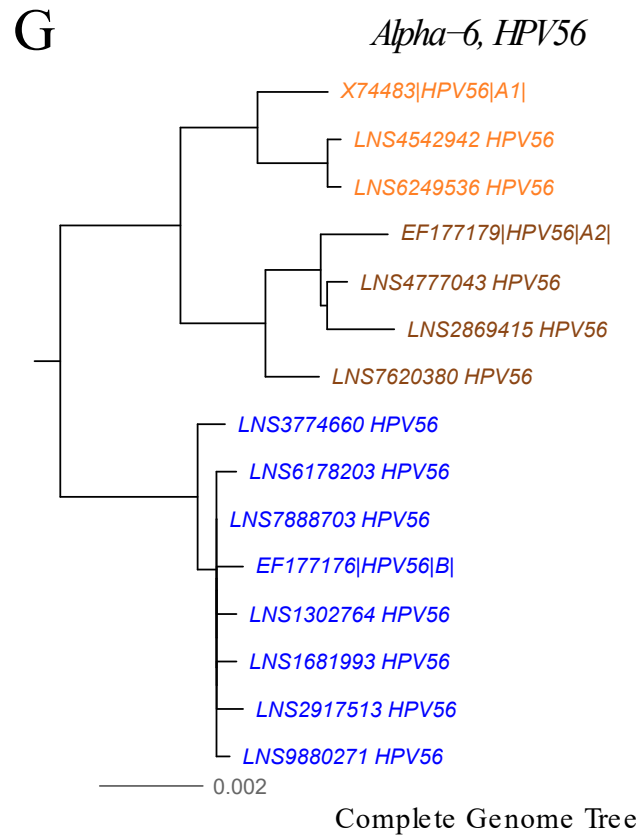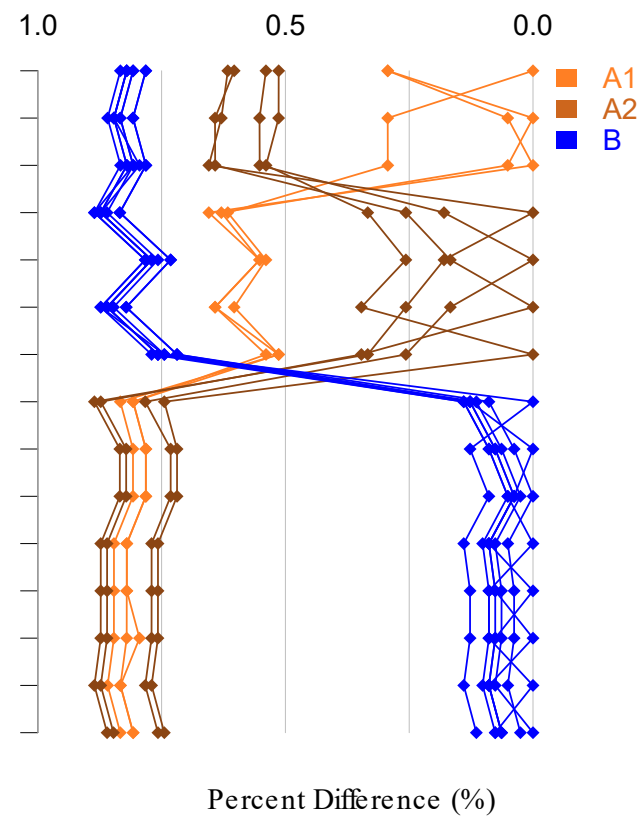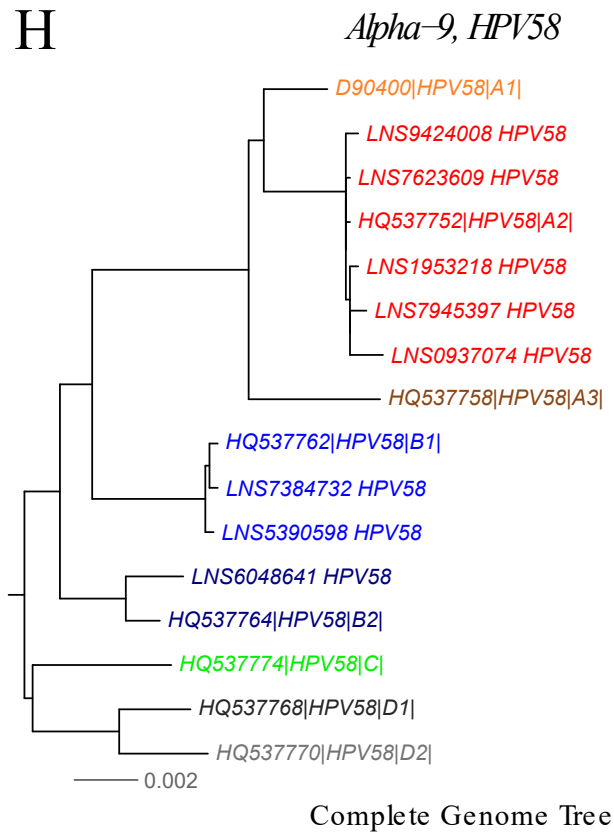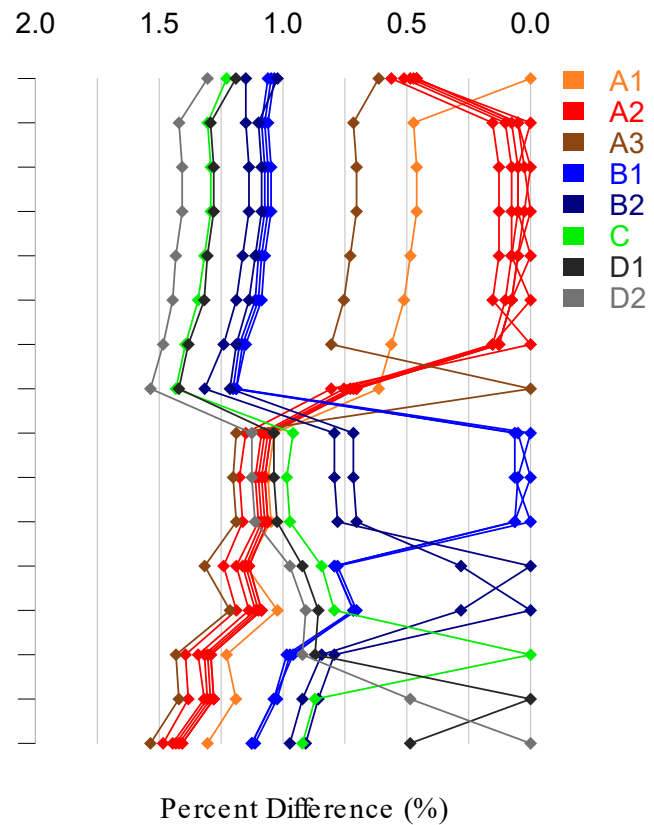

# I

## *Alpha-7, HPV68*

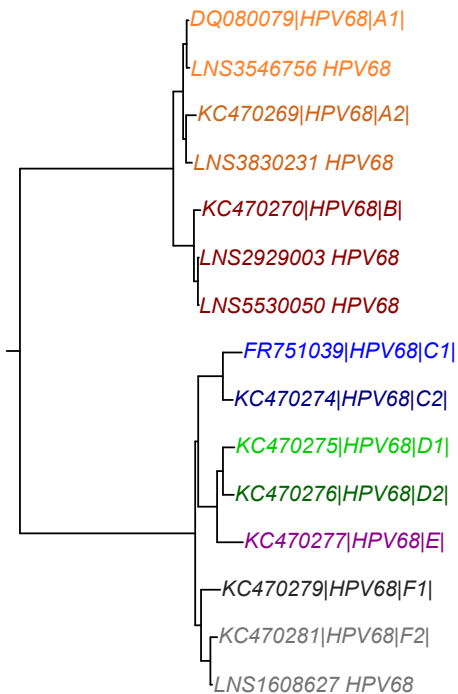

-0.002

Complete Genome Tree

7.0 6.0 5.0 4.0 3.0 2.0 1.0 0.0

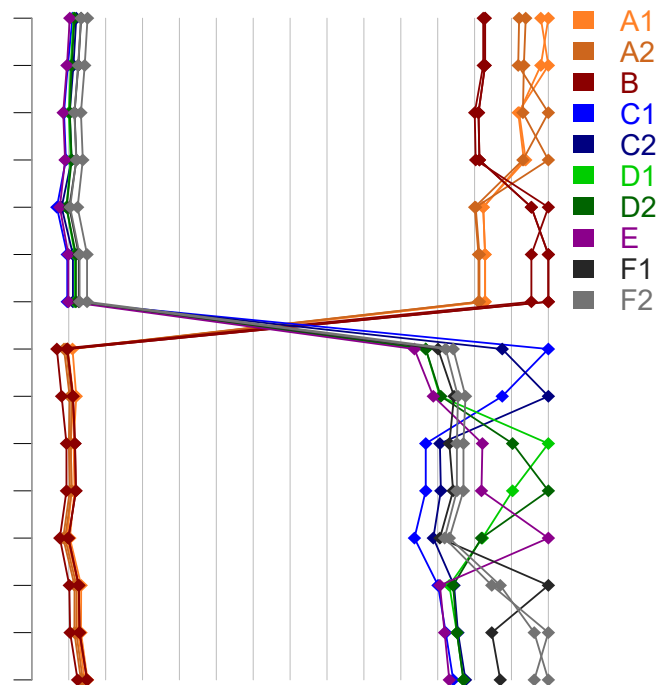

Percent Difference (%)
