# Supplementary material for: Characterization and Diversity of 243 Complete Human Papillomavirus Genomes in Cervical Swabs Using Next Generation Sequencing
Source: MDPI journal article supplement (doi:10.3390/v12121437), 2020-12-14
Supplement: s1 [file s1]

A

*Alpha-11, HPV34*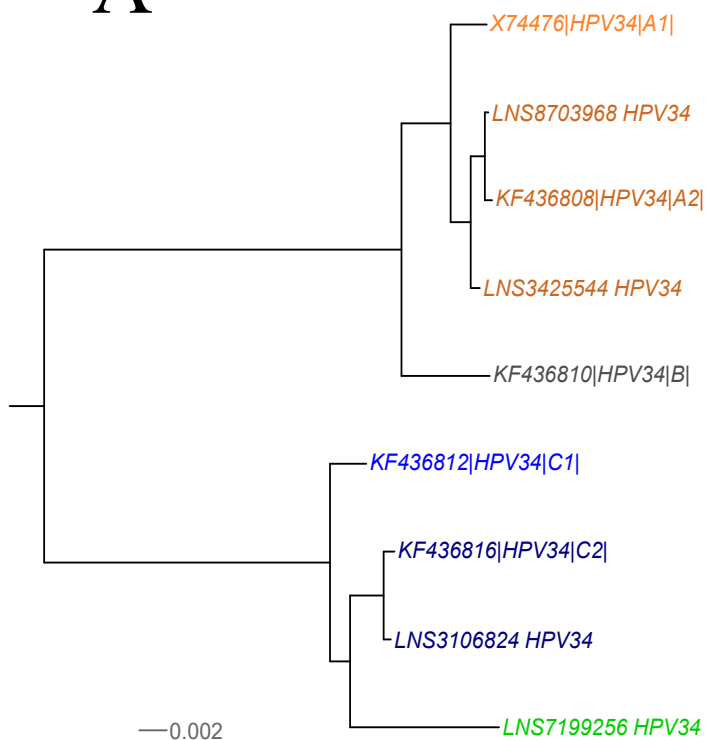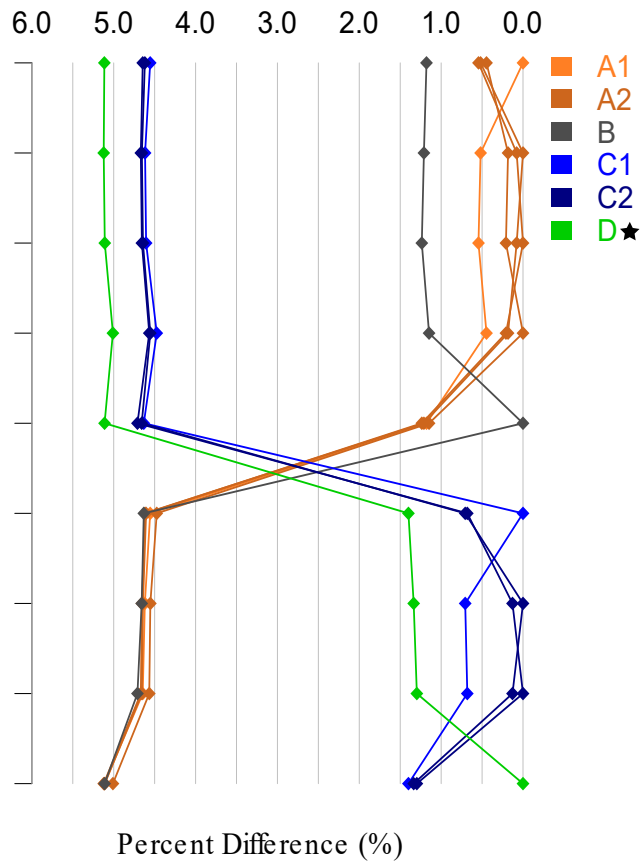

B

*Alpha-8, HPV40*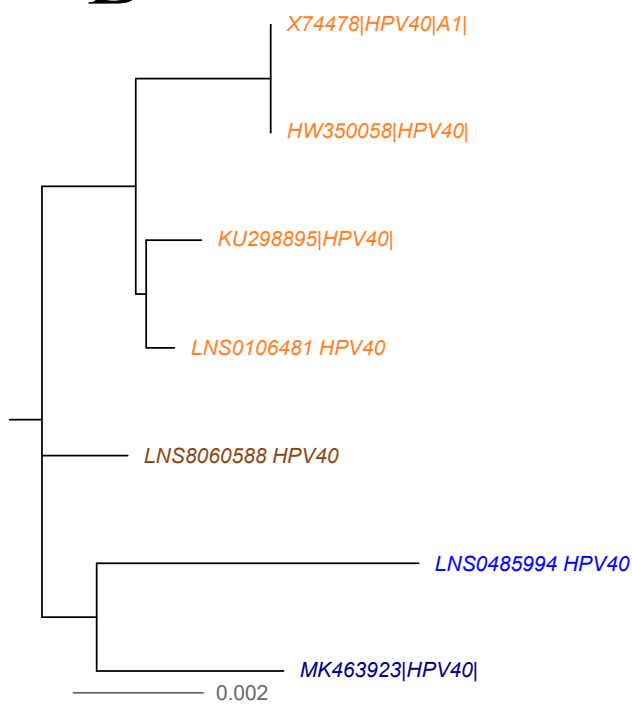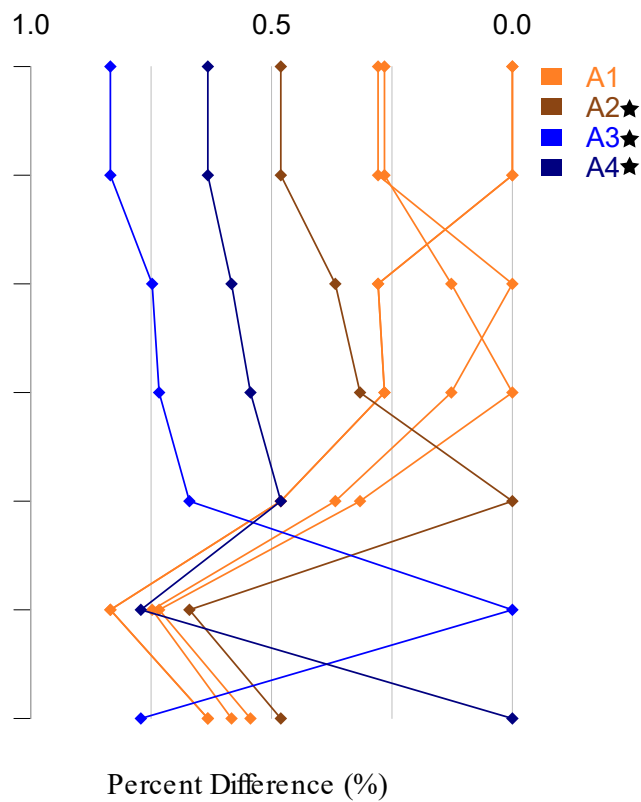

*Alpha-1, HPV42*

C

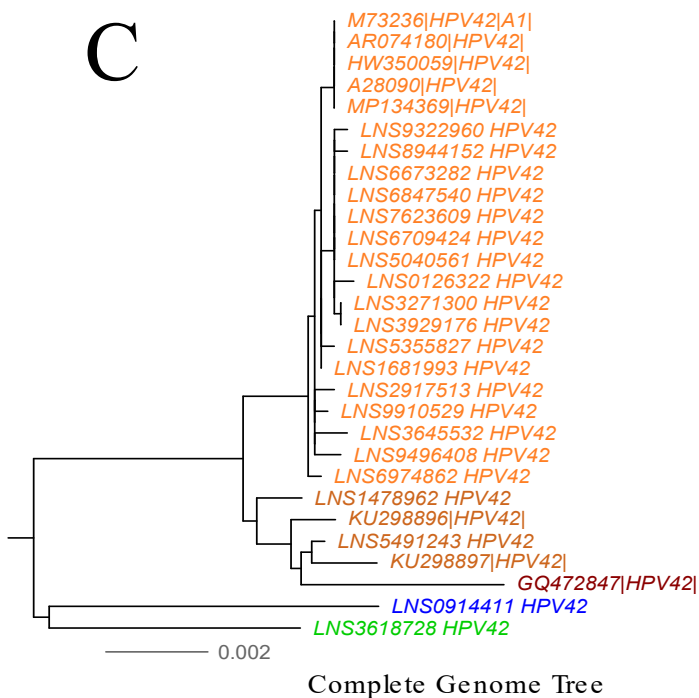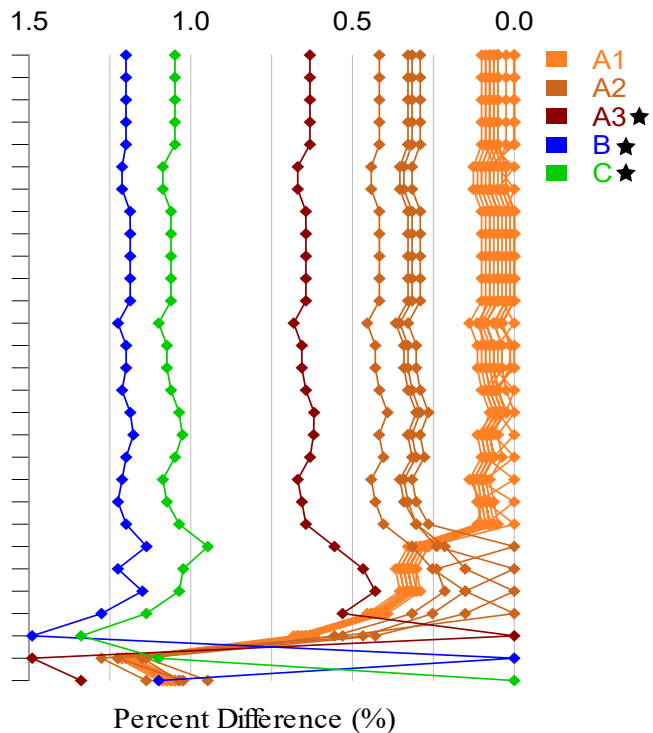

*Alpha-8, HPV43*

D

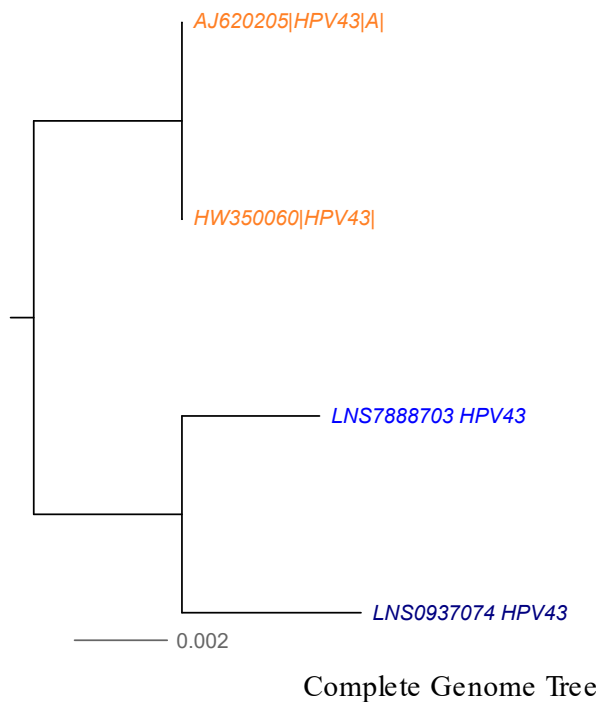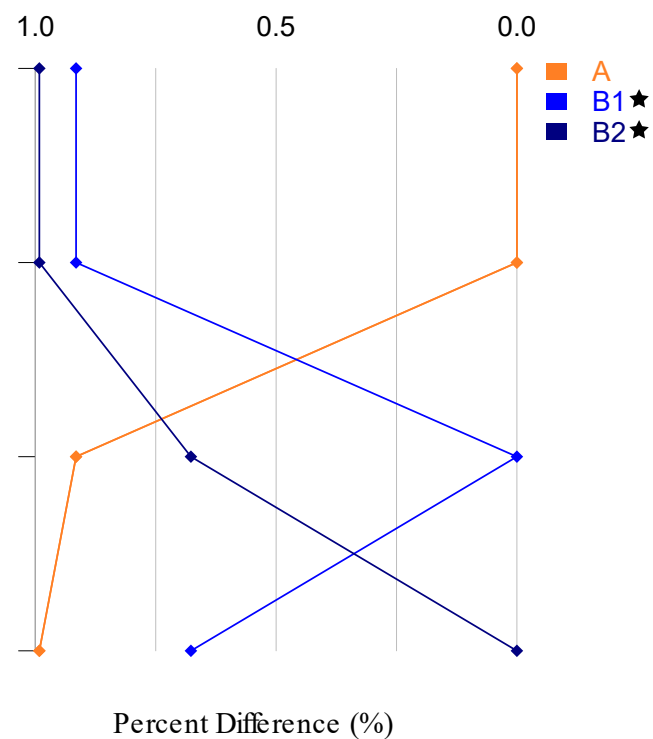

E

*Alpha-13, HPV54*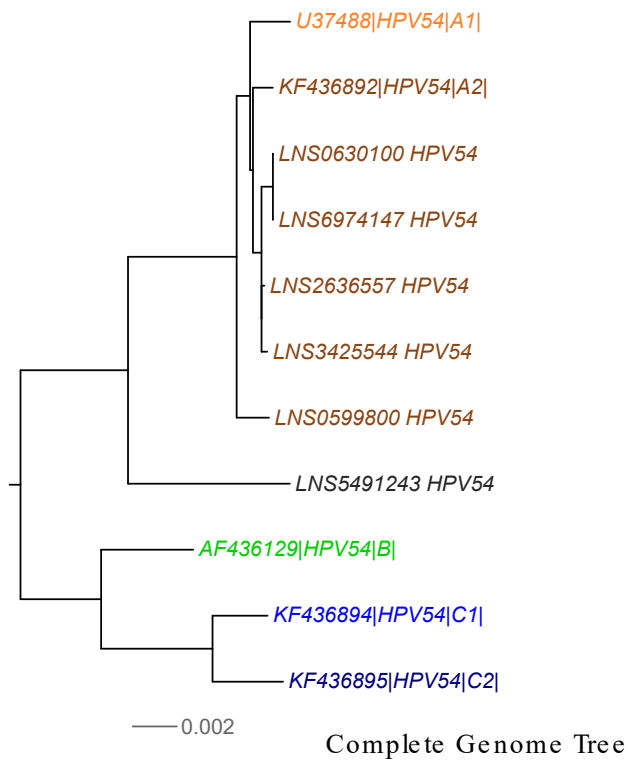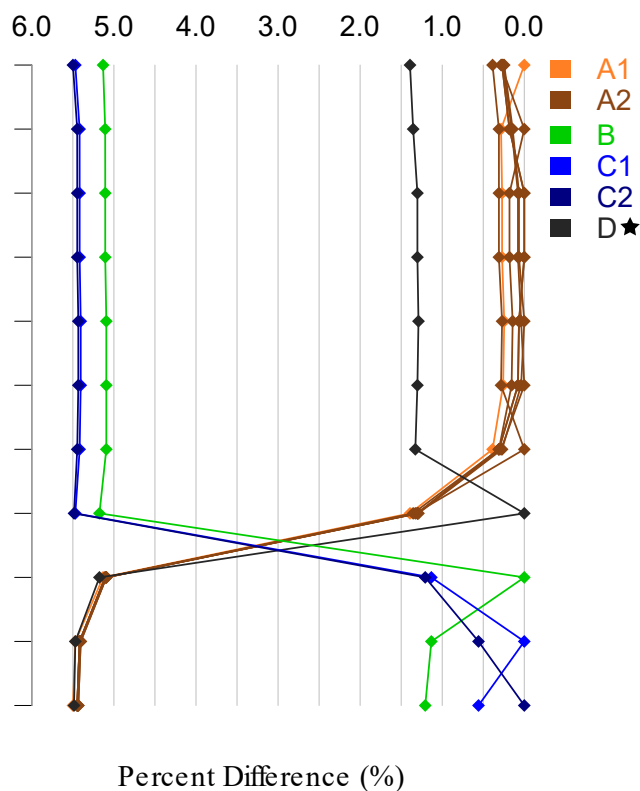

F

*Alpha-3, HPV61*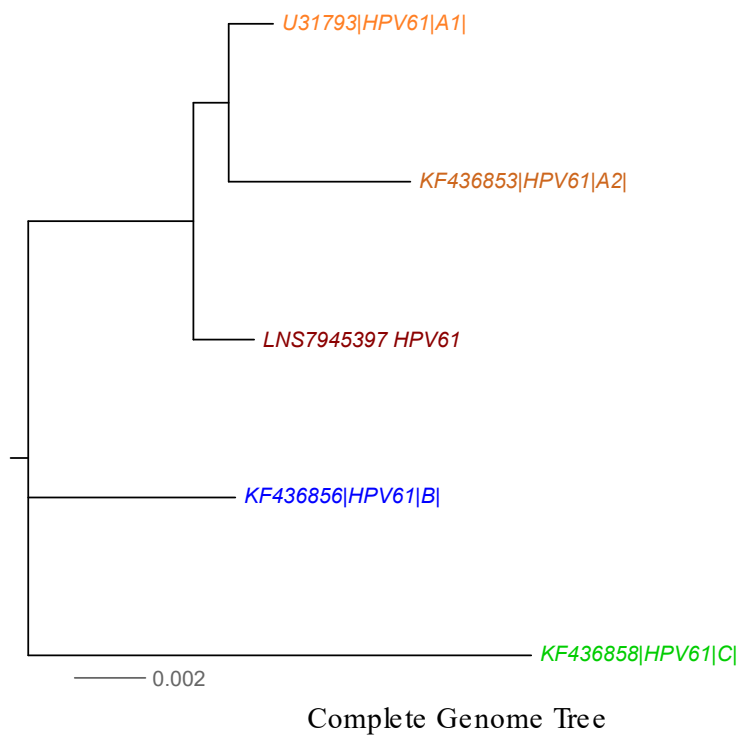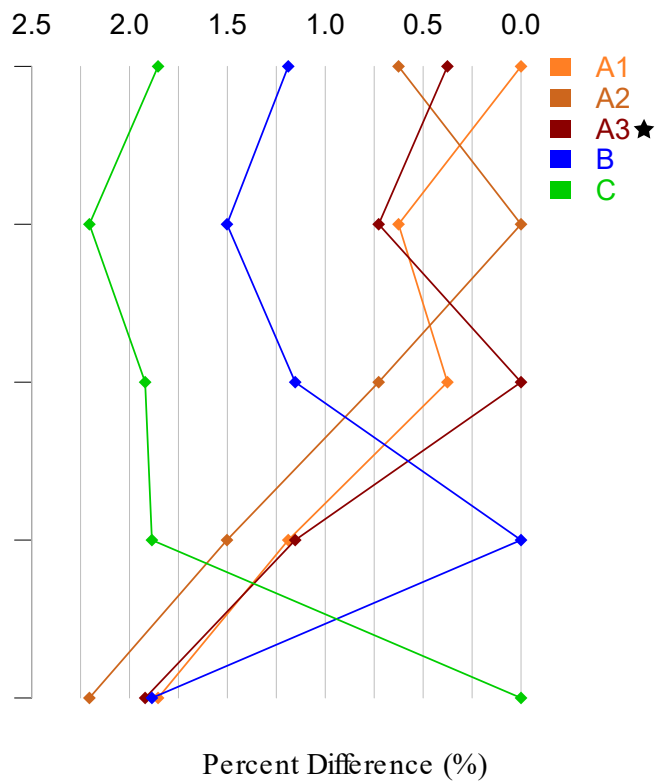

G

*Alpha-3, HPV62*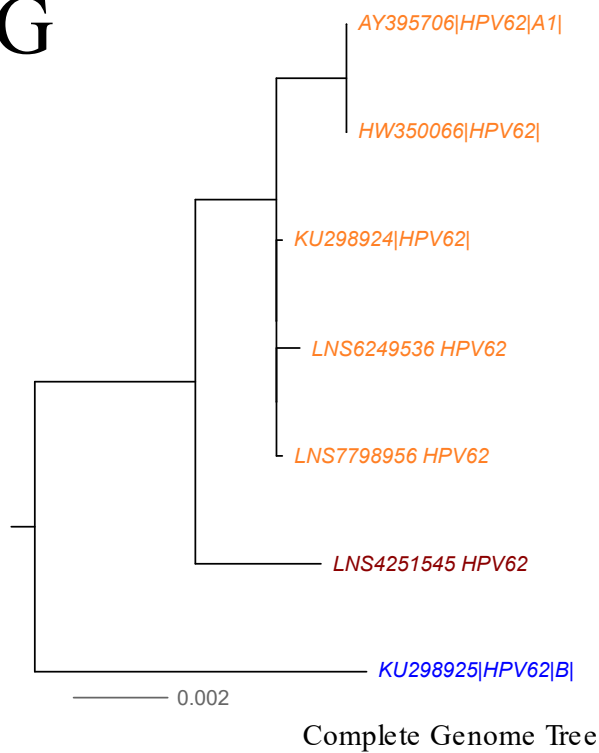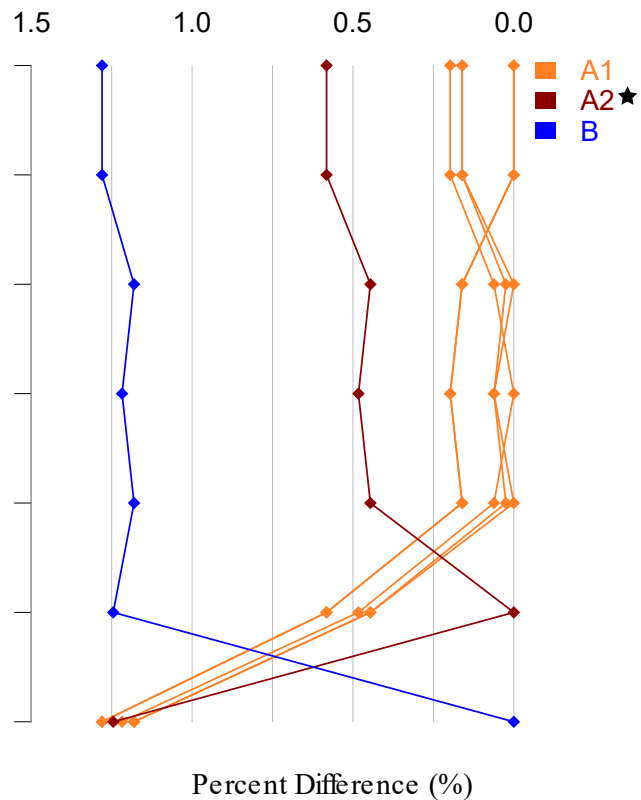

H

*Alpha-9, HPV67*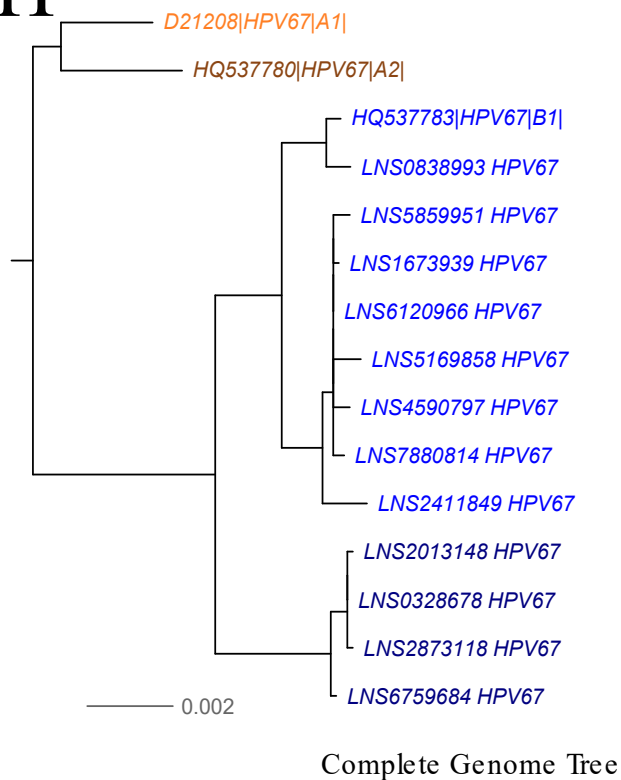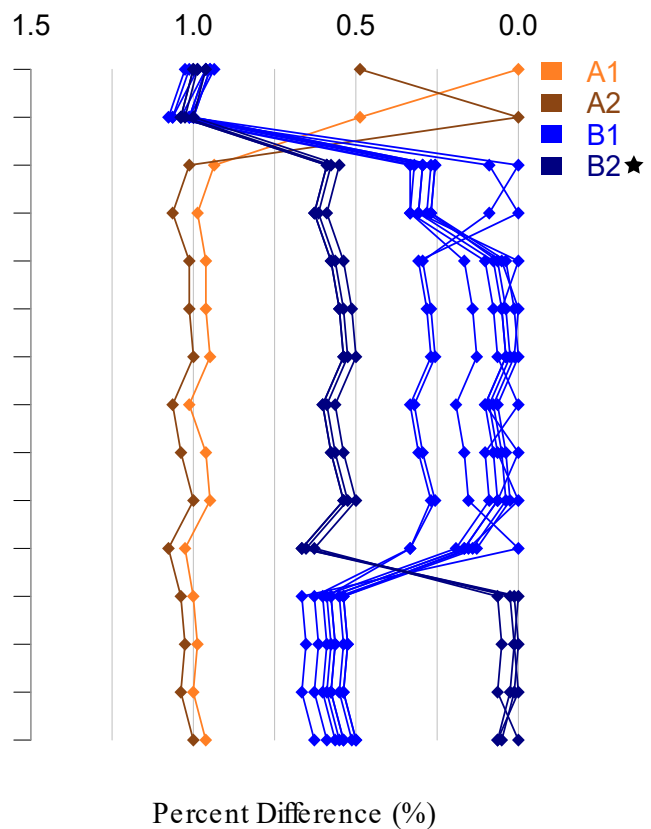

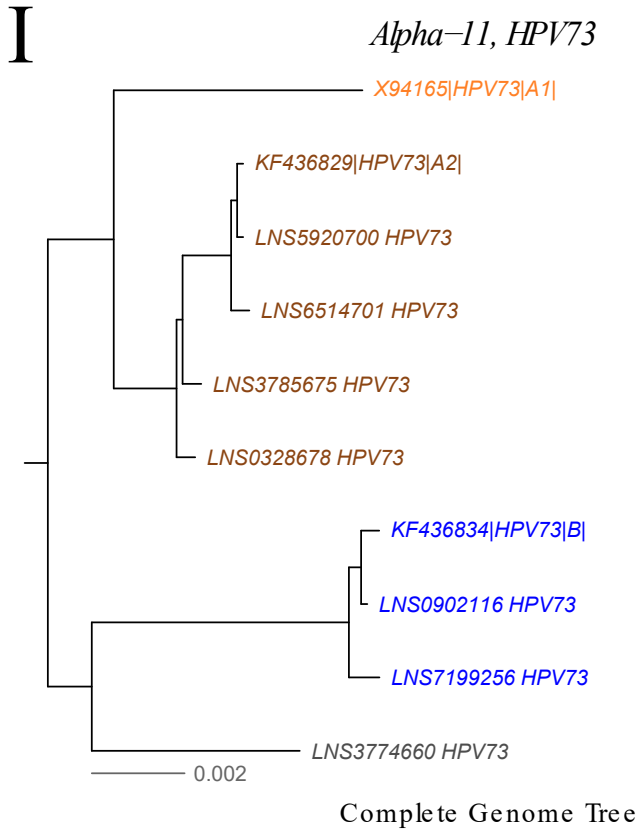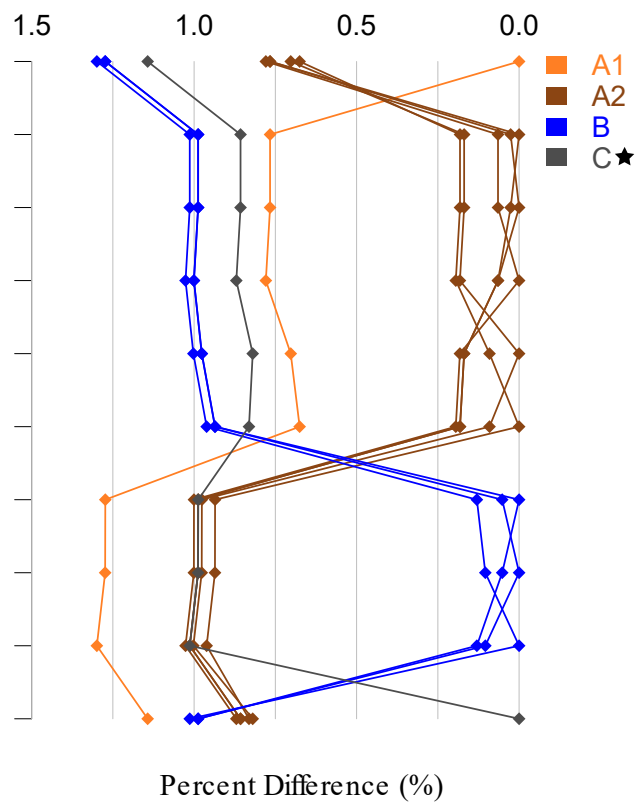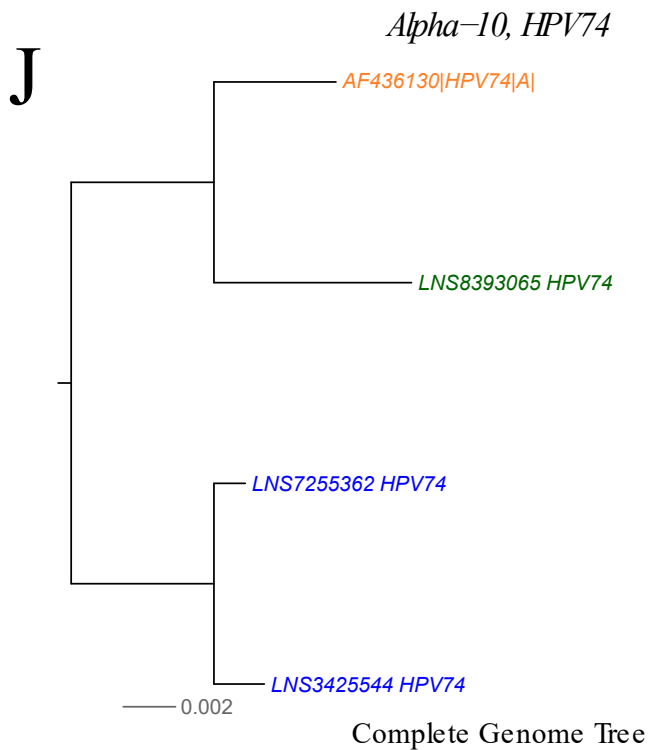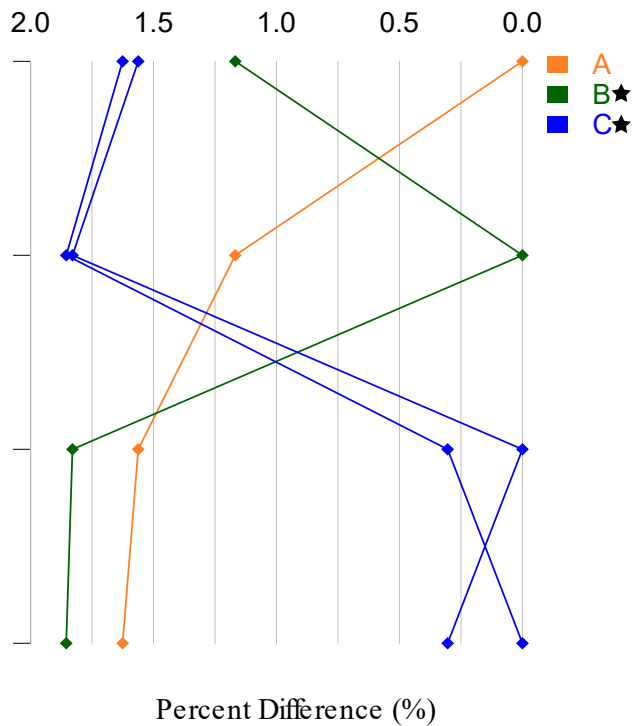

K

*Alpha-3, HPV84*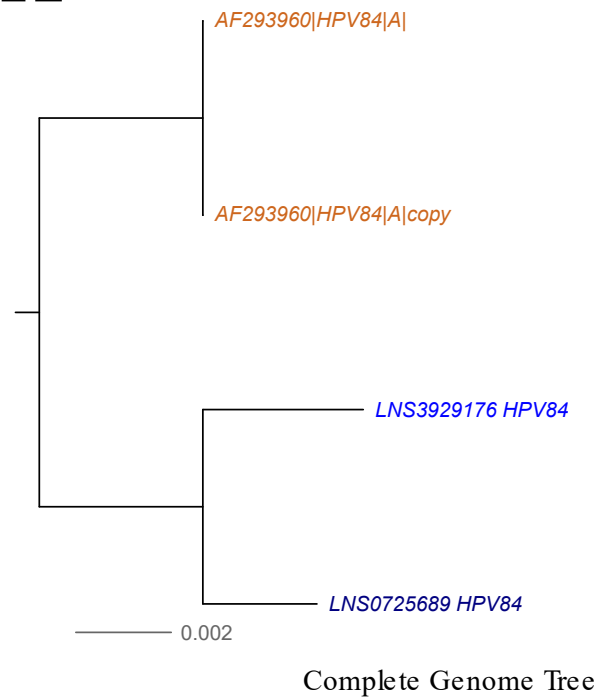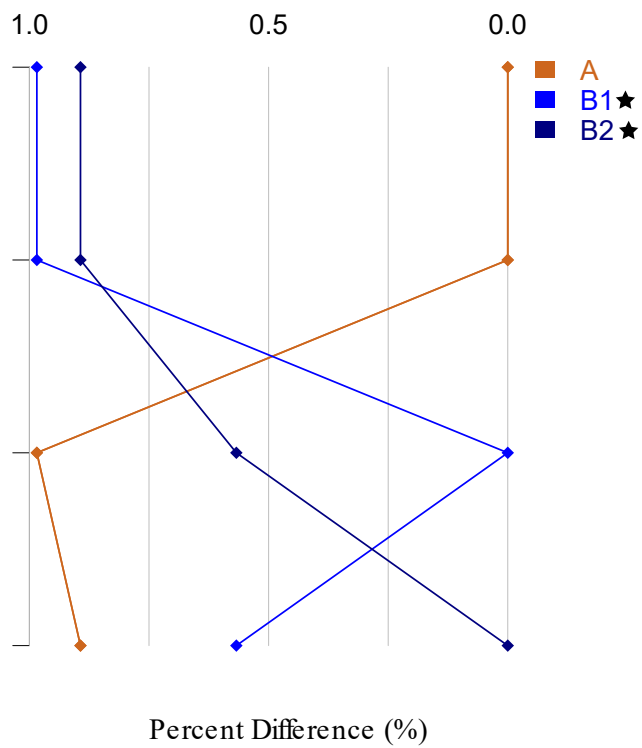

L

*Alpha-14, HPV90*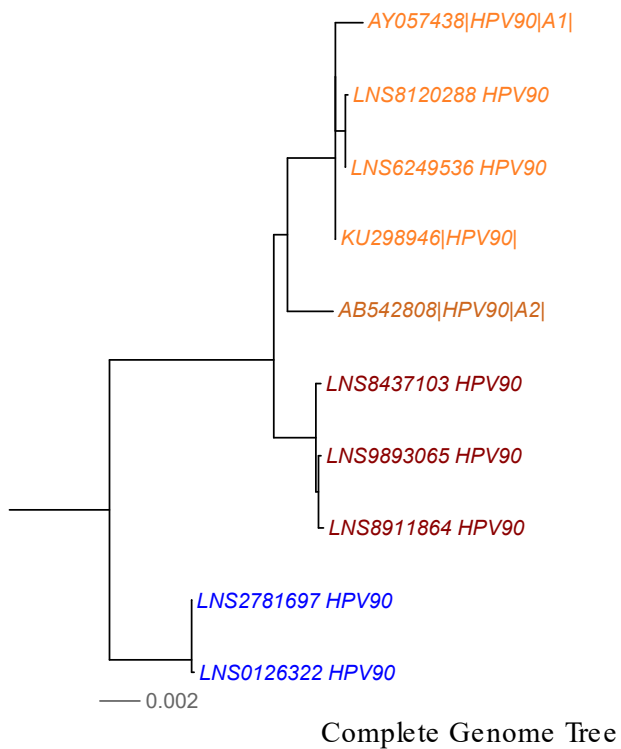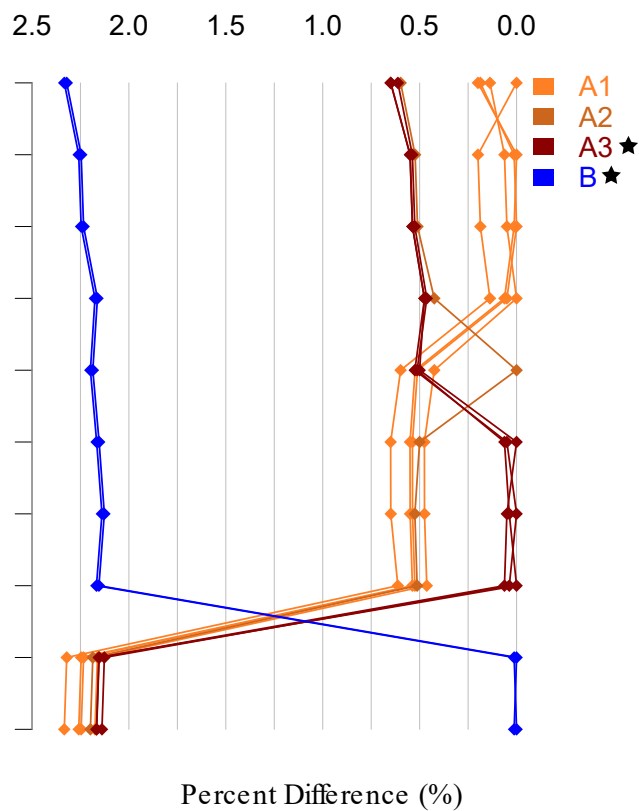

M

*Alpha-8, HPV91*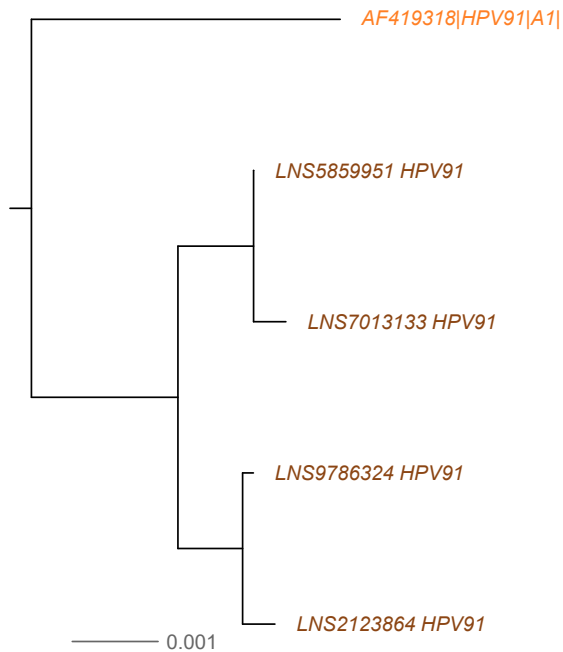

Complete Genome Tree

1.0

0.5

0.0

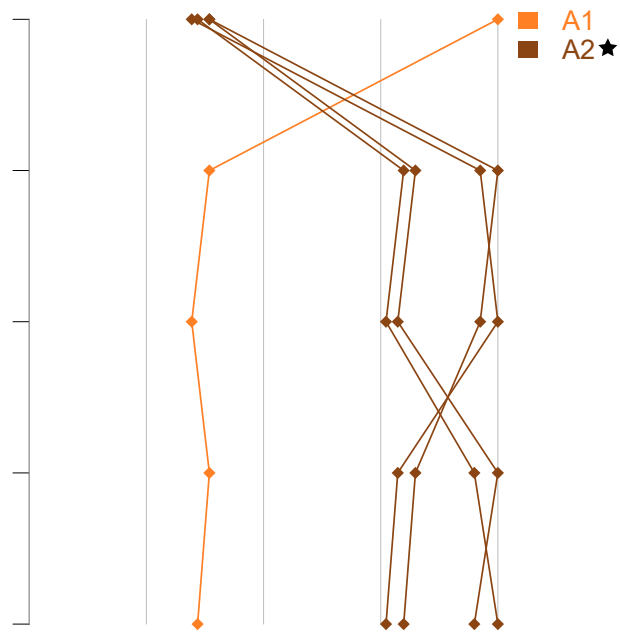

Percent Difference (%)
